# Supplementary material for: A new strategy of post-polymerization modification to prepare functionalized poly(disubstituted acetylenes)
Source: Royal Society of Chemistry journal article supplement (doi:10.1039/c3py01164j), 2013-11-25
Supplement: c3py01164j.pdf [file c3py01164j.pdf]

**Electronic Supplementary Information (ESI) for**

**A new strategy of post-polymerization modification to prepare  
functionalized poly(disubstituted acetylenes)**

Yuan Gao,<sup>a</sup> Xiao Wang,<sup>a</sup> Li Tong,<sup>a</sup> Anjun Qin,<sup>a</sup> Jing Zhi Sun\*<sup>a</sup> and Ben Zhong Tang\*<sup>a, b</sup>

<sup>a</sup>MOE Key Laboratory of Macromolecular Synthesis and Functionalization, Department of Polymer Science and Engineering, Institute of Biomedical Macromolecules, Zhejiang University, Hangzhou 310027, PR China;

<sup>b</sup>Department of Chemistry, Institute for Advanced Study, Institute of Molecular Functional Materials, State Key Laboratory of Molecular Neuroscience, and Division of Biomedical Engineering, The Hong Kong University of Science & Technology, Clear Water Bay, Kowloon, Hong, China.

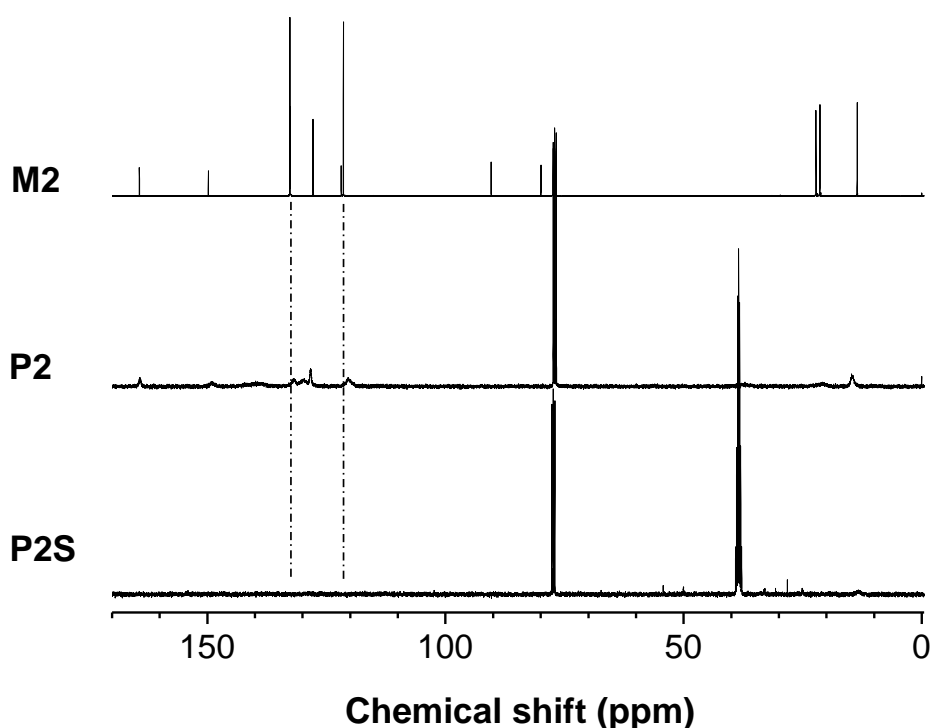

**Fig. S1** <sup>13</sup>C NMR spectra of **M2**, **P2** and **P2S**. The disappearance of the chemical shifts implies the elimination of the vinyl groups.

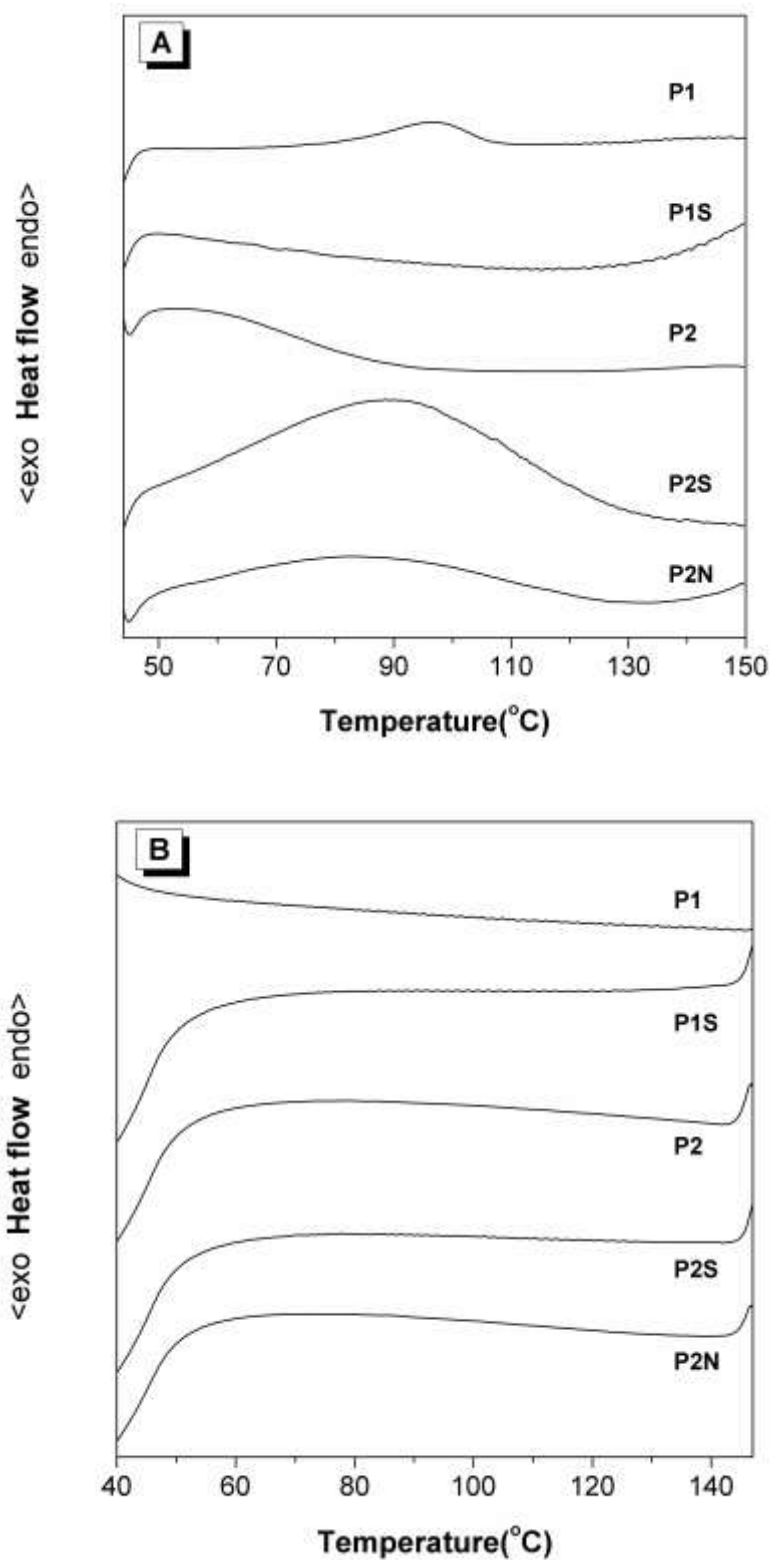

**Fig. S2** Differential scanning calorimetric (DSC) curves for all polymer samples (**P1**, **P2**, **P1S**, **P2S**, and **P2N**), (A) and (B) are heating and cooling processes respectively. Scanning rate: 20 °C/min; hold for 2.0 min at 150.00 °C.

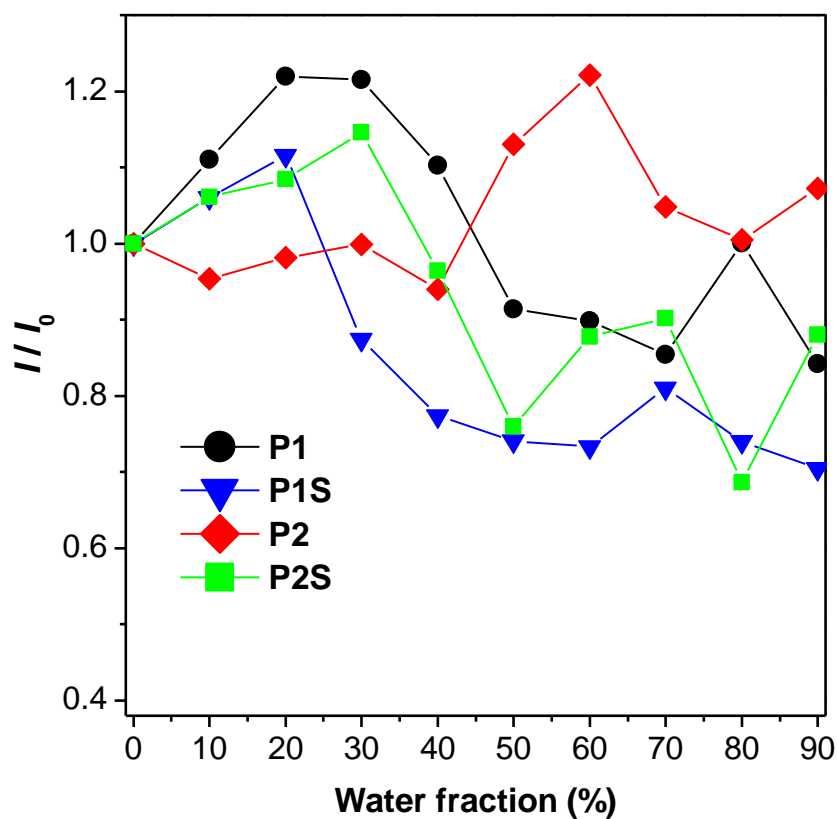

**Fig. S3** Variation of the relative fluorescence intensity ( $I/I_0$ ) of the obtained poly(disubstituted acetylenes) (**P1**, **P2**, **P1S** and **P2S**) in THF/water mixtures with changing water fraction (by volume) from 0 to 90% , where  $I$  and  $I_0$  are the fluorescence intensity recorded for the samples in the pure THF solution. Polymer concentration: 10  $\mu\text{M}$ ; Excitation wavelength: 280 nm.
